# Supplementary material for: Fast‐acting insulin aspart versus insulin aspart in the setting of insulin degludec‐treated type 1 diabetes: Efficacy and safety from a randomized double‐blind trial
Source: PubMed Central journal article supplement — Diabetes Obes Metab. 2018 Oct 10;20(12):2885–93. doi: 10.1111/dom.13545 (PMC6231963; doi:10.1111/dom.13545), 2018-10-10
Supplement: NIHMS991115-supplement-Supp_info.pdf [file NIHMS991115-supplement-Supp_info.pdf]

## Supplementary Material

### Fast-acting insulin aspart versus insulin aspart in the setting of insulin degludec-treated type 1 diabetes: efficacy and safety from a randomized double-blind trial

John B. Buse MD PhD, Anders L. Carlson MD, Mitsuhsa Komatsu MD PhD, Ofri Mosenzon MD, Ludger Rose MD, Bo Liang MD PhD, Kristine Buchholtz MD PhD, Hiroshi Horio MSc, Takashi Kadowaki MD PhD

Supplementary Figure 1. Trial design

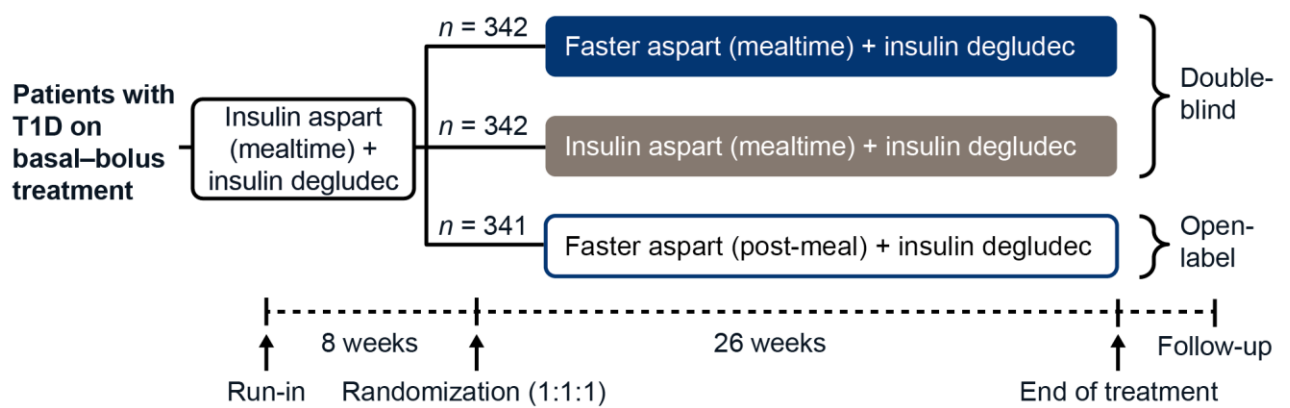

ClinicalTrials.gov: NCT02500706. Baseline is at randomization. Follow-up was 30 days.

Faster aspart; fast-acting insulin aspart; T1D, type 1 diabetes

**Supplementary Figure 2.** Stepwise hierarchical testing procedure for confirmatory hypotheses

| <b>Position</b>       | <b>Confirmatory hypotheses</b>                                                                           |
|-----------------------|----------------------------------------------------------------------------------------------------------|
| <b>1<sup>st</sup></b> | Change from baseline in HbA1c: non-inferiority of mealtime faster aspart versus insulin aspart           |
| <b>2<sup>nd</sup></b> | Change from baseline in HbA1c: non-inferiority of post-meal faster aspart versus insulin aspart          |
| <b>3<sup>rd</sup></b> | Change from baseline in 1-h PPG increment: superiority of mealtime faster aspart versus insulin aspart   |
| <b>4<sup>th</sup></b> | Change from baseline in HbA1c: superiority of mealtime faster aspart versus insulin aspart               |
| <b>5<sup>th</sup></b> | Change from baseline in 1,5-anhydroglucitol: superiority of mealtime faster aspart versus insulin aspart |

All available information regardless of treatment discontinuation was used. Rejection of the null hypothesis was only confirmed for analyses where all previous null-hypotheses had been rejected in favour of faster aspart. The hierarchical statistical testing procedure was stopped after step 4 as HbA1c superiority of faster aspart versus insulin aspart could not be confirmed.

Faster aspart, fast-acting insulin aspart; PPG, postprandial glucose.

**Supplementary Figure 3. Patient disposition**

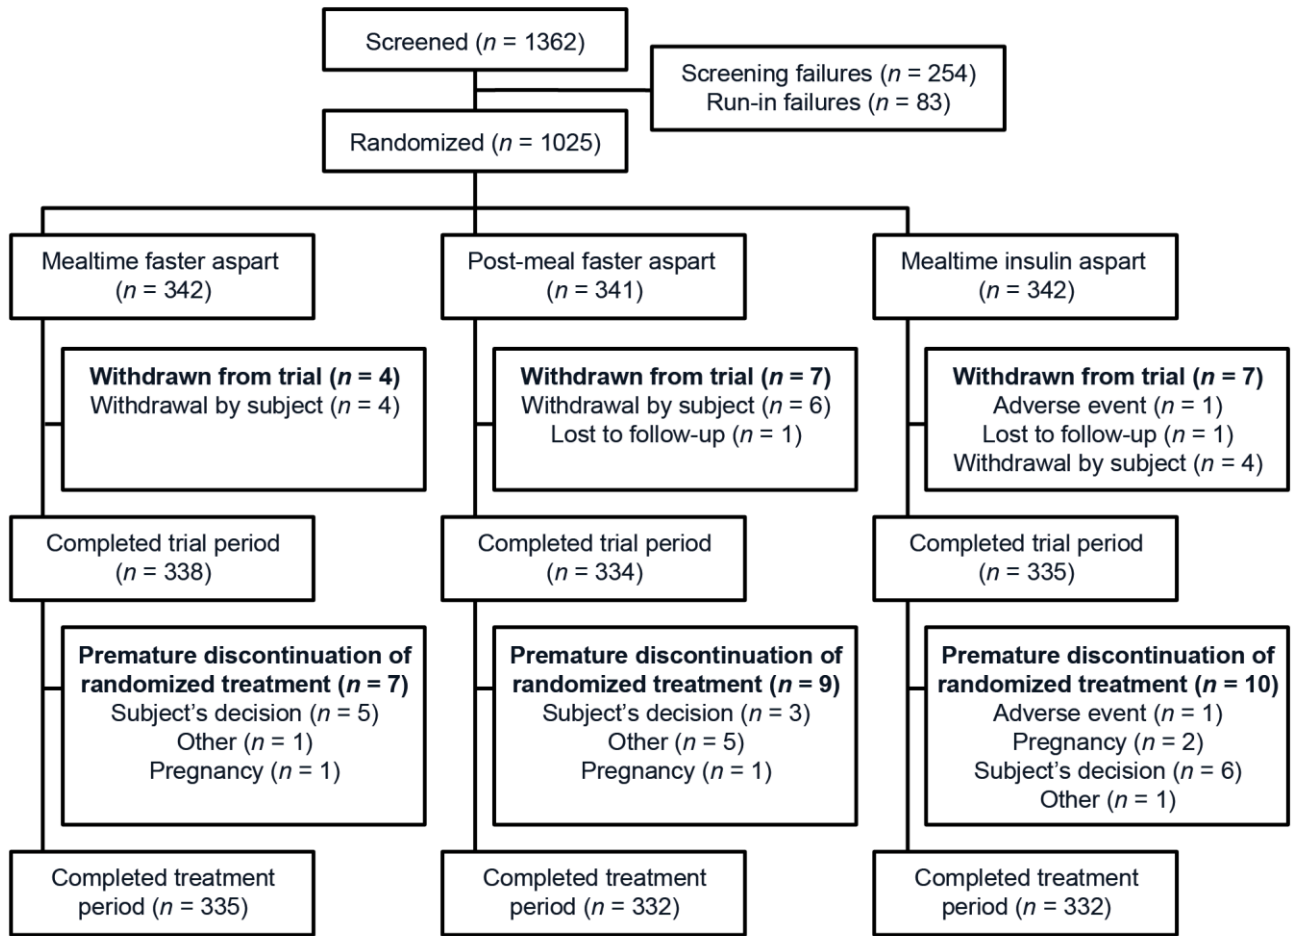

Treatment period: the period from week 0 to week 26 without premature discontinuation of randomized treatment. Trial period: the period from week 0 to week 26.

Faster aspart, fast-acting insulin aspart.

**Supplementary Figure 4.** 9-point SMBG profiles at A) baseline and B) end of trial

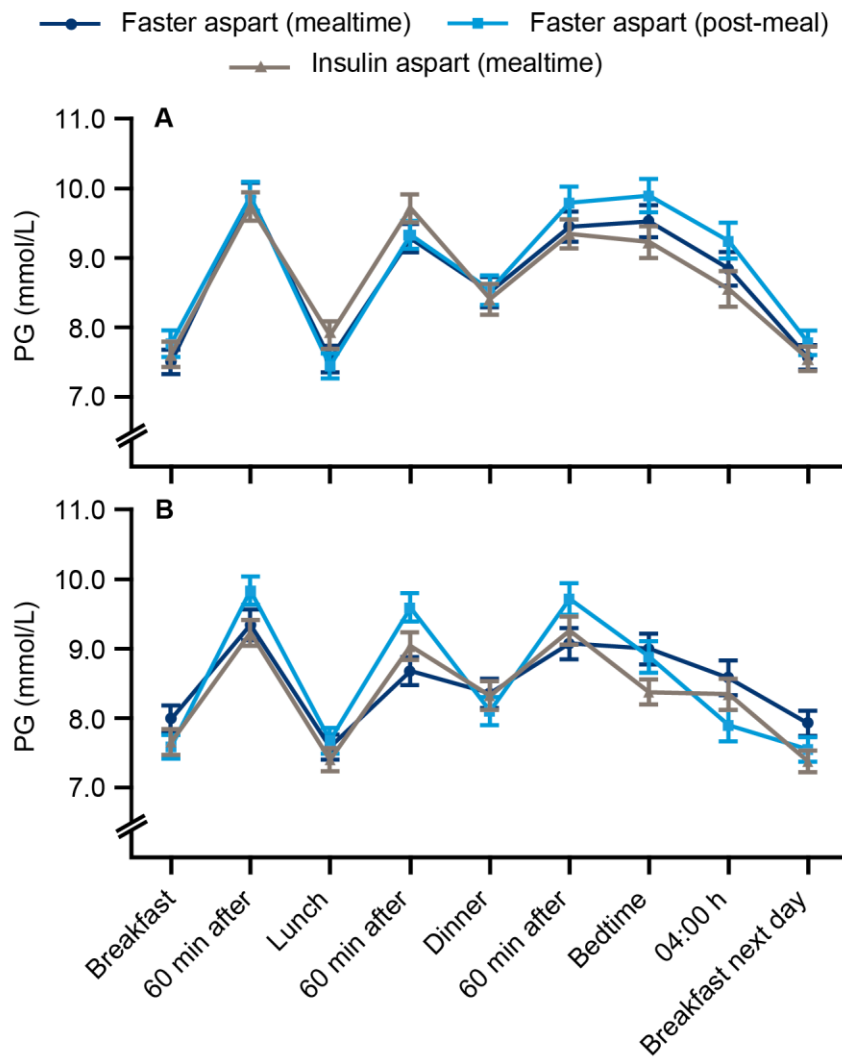

Error bars:  $\pm$  standard error (mean).

All available information regardless of treatment discontinuation was used.

PG, plasma glucose; SMBG, self-measured blood glucose.

**Supplementary Table 1.** Basal insulin dose conversion

| <b>Prior basal insulin dose<br/>and HbA1c</b>                           | <b>Initial insulin degludec dose</b>                                                                                              |
|-------------------------------------------------------------------------|-----------------------------------------------------------------------------------------------------------------------------------|
| Once-daily basal insulin <u>and</u><br>HbA1c $\geq 8.0\%$ (64 mmol/mol) | Switch to once-daily insulin degludec on a unit-to-unit basis at the investigator's discretion                                    |
| Twice-daily basal insulin <u>or</u><br>HbA1c $< 8.0\%$ (64 mmol/mol)    | Switch to once-daily insulin degludec at a dose determined on an individual basis by the investigator, considering dose reduction |

**Supplementary Table 2.** Basal insulin titration algorithm

| <b>Pre-breakfast blood glucose (mmol/L)</b> | <b>Insulin degludec dose adjustment (U)</b> |
|---------------------------------------------|---------------------------------------------|
| <3.1                                        | -4 (or 10% if dose >45 U)*                  |
| 3.1–3.9                                     | -2 (or 5% if dose >45 U)*                   |
| <b>4.0–5.0</b>                              | <b>No adjustment</b>                        |
| 5.1–10.0                                    | +2                                          |
| 10.1–15.0                                   | +4                                          |
| >15.0                                       | +6                                          |

\*Dose reduction if one of the SMBG values was below target (<4.0 mmol/L).

SMBG, self-measured blood glucose.

**Supplementary Table 3.** Bolus dose titration algorithm

| <b>Pre-prandial glucose (mmol/L)</b> | <b>Dose adjustment (U)</b> | <b>Rules for dose adjustments</b>                           |
|--------------------------------------|----------------------------|-------------------------------------------------------------|
| <4.0                                 | -1                         | ≥1 SMBG below target                                        |
| <b>4.0–6.0</b>                       | <b>No adjustment</b>       | <b>0–1 SMBG above target</b><br><b>No SMBG below target</b> |
| >6.0                                 | +1                         | ≥2 SMBG above target<br>No SMBG below target                |

Adjustments were made twice weekly, once by the investigator and once by the participant.  
SMBG, self-measured blood glucose.

**Supplementary Table 4:** Trial endpoints (pre-specified)

---

|                                                |                                                                                                                                                                                                                                                                                                                                                                                                                                                                                                                                                                                                                                                                                                                                                                                                                                                                                                                                                                                                                                                                                                                                                                                                                                    |
|------------------------------------------------|------------------------------------------------------------------------------------------------------------------------------------------------------------------------------------------------------------------------------------------------------------------------------------------------------------------------------------------------------------------------------------------------------------------------------------------------------------------------------------------------------------------------------------------------------------------------------------------------------------------------------------------------------------------------------------------------------------------------------------------------------------------------------------------------------------------------------------------------------------------------------------------------------------------------------------------------------------------------------------------------------------------------------------------------------------------------------------------------------------------------------------------------------------------------------------------------------------------------------------|
| <b>Primary endpoint</b>                        | <ul style="list-style-type: none"><li>• Change from baseline in HbA1c after 26 weeks of randomized treatment</li></ul>                                                                                                                                                                                                                                                                                                                                                                                                                                                                                                                                                                                                                                                                                                                                                                                                                                                                                                                                                                                                                                                                                                             |
| <b>Confirmatory secondary endpoints</b>        | <ul style="list-style-type: none"><li>• Change from baseline in 1-h PPG increment (meal test) after 26 weeks of randomized treatment</li><li>• Change from baseline in 1,5-anhydroglucitol<br/>26 weeks after randomization</li></ul>                                                                                                                                                                                                                                                                                                                                                                                                                                                                                                                                                                                                                                                                                                                                                                                                                                                                                                                                                                                              |
| <b>Supportive secondary efficacy endpoints</b> | <ul style="list-style-type: none"><li>• Change from baseline in FPG after 26 weeks of randomized treatment</li><li>• Percentage of participants reaching HbA1c targets:<ul style="list-style-type: none"><li>– &lt;7.0% (53 mmol/mol)</li><li>– &lt;7.0% (53 mmol/mol) without severe hypoglycemia</li><li>– &lt;7.0% (53 mmol/mol) without severe hypoglycemia and with minimal weight gain (&lt;3.0%)</li></ul></li><li>• Change from baseline in 30-min, 1-h, 2-h, 3-h and 4-h PPG and PPG increment (meal test)</li><li>• Change from baseline in 7-9-7-point SMBG assessed by:<ul style="list-style-type: none"><li>– Mean of the 7-9-7-point profile</li><li>– PPG and PPG increment (mean, breakfast, lunch, main evening meal)</li></ul></li><li>• Percentage of participants reaching PPG target (overall mean of daily postprandial glucose measurements in SMBG):<ul style="list-style-type: none"><li>– Overall postprandial glucose (1 h) <math>\leq 7.8</math> mmol/L</li></ul></li><li>• Change from baseline in lipids–lipoproteins profile (total cholesterol, high density lipoproteins, low density lipoproteins)</li><li>• Insulin dose (basal insulin dose, total and individual meal insulin dose)</li></ul> |

---



---

**Supportive secondary safety endpoints**

- Number of treatment-emergent adverse events during the 26 weeks after randomization
  - Number of treatment-emergent injection-site reactions during the 26 weeks after randomization
  - Number of hypoglycemic episodes during the 26 weeks after randomization
    - Overall
    - Following a meal (1, 1–2, 2–3, 3–4 h)
  - Change from baseline 26 weeks after randomization in clinical evaluations:
    - Physical examination
    - Vital signs
    - Electrocardiogram
    - Fundoscopy
  - Change from baseline 26 weeks after randomization in central laboratory assessments:
    - Hematology
    - Biochemistry
    - Urinalysis
  - Change from baseline in anti-insulin aspart (specific and cross-reacting with human insulin)
  - Change from baseline in body weight
- 

FPG, fasting plasma glucose; PPG, postprandial glucose; SMBG, self-measured blood glucose.

**Supplementary Table 5. Confirmatory statistical analysis**

| <b>Endpoint [comparison]</b>                                                                                                                                     | <b>Estimate [95% CI]</b> | <b>P value<sup>†</sup></b> | <b>Conclusion</b>                                       |
|------------------------------------------------------------------------------------------------------------------------------------------------------------------|--------------------------|----------------------------|---------------------------------------------------------|
| <b>PRIMARY</b>                                                                                                                                                   |                          |                            |                                                         |
| Step 1<br><b>Change from baseline in HbA1c 26 weeks after randomization (%)</b><br>[mealtime faster aspart–mealtime insulin aspart]                              | −0.02 [−0.11; 0.07]      | <0.001                     | <i>Non-inferiority confirmed with one-sided P-value</i> |
| <b>CONFIRMATORY SECONDARY</b>                                                                                                                                    |                          |                            |                                                         |
| Step 2<br><b>Change from baseline in HbA1c 26 weeks after randomization (%)</b><br>[post-meal faster aspart–mealtime insulin aspart]                             | 0.10 [0.004; 0.19]       | <0.001                     | <i>Non-inferiority confirmed with one-sided P-value</i> |
| Step 3<br><b>Change from baseline in 1-h PPG increment 26 weeks after randomization (meal test) (mmol/L)</b><br>[mealtime faster aspart–mealtime insulin aspart] | −0.90 [−1.36; −0.45]     | <0.001                     | <i>Superiority confirmed with one-sided P-value</i>     |
| Step 4<br><b>Change from baseline in HbA1c 26 weeks after randomization (%)</b><br>[mealtime faster aspart–mealtime insulin aspart]                              | −0.02 [−0.11; 0.07]      | 0.316                      | <i>Superiority not confirmed with one-sided P-value</i> |
| Step 5<br><b>Change from baseline in 1,5-anhydroglucitol 26 weeks after randomization (µg/mL)</b><br>[mealtime faster aspart–mealtime insulin aspart]            | 0.02 [−0.31; 0.34]       |                            | <i>Testing procedure stopped</i>                        |

<sup>†</sup>P-values are from the one-sided test for non-inferiority and superiority respectively evaluated at the 2.5% level.

All available information regardless of treatment discontinuation was used.

Faster aspart, fast-acting insulin aspart; PPG, postprandial glucose.

**Supplementary Table 6. Summary of supportive endpoints**

|                                                                                     | <b>Faster aspart<br/>(mealtime), %</b>        | <b>Faster aspart<br/>(post-meal),<br/>%</b>    | <b>Insulin aspart<br/>(mealtime), %</b>        | <b>Treatment comparison</b>      | <b>Estimated OR<br/>[95% CI]</b>  |
|-------------------------------------------------------------------------------------|-----------------------------------------------|------------------------------------------------|------------------------------------------------|----------------------------------|-----------------------------------|
| <b>HbA1c responders 26 weeks after randomization</b>                                |                                               |                                                |                                                |                                  |                                   |
| HbA1c <7.0% (58 mmol/mol)                                                           | 28.7                                          | 28.2                                           | 32.7                                           | Mealtime faster aspart vs. IAsp  | 0.88 [0.60; 1.29]                 |
|                                                                                     |                                               |                                                |                                                | Post-meal faster aspart vs. IAsp | 0.80 [0.55; 1.17]                 |
| HbA1c <7.0 (58 mmol/mol)<br>without severe hypoglycaemia                            | 25.7                                          | 26.4                                           | 30.4                                           | Mealtime faster aspart vs. IAsp  | 0.83 [0.56; 1.22]                 |
|                                                                                     |                                               |                                                |                                                | Post-meal faster aspart vs. IAsp | 0.82 [0.56; 1.20]                 |
| HbA1c <7.0 (58 mmol/mol)<br>without severe hypoglycaemia<br>and minimal weight gain | 16.4                                          | 17.9                                           | 19.3                                           | Mealtime faster aspart vs. IAsp  | 0.87 [0.56; 1.34]                 |
|                                                                                     |                                               |                                                |                                                | Post-meal faster aspart vs. IAsp | 0.95 [0.62; 1.45]                 |
| <b>PPG responders 26 weeks after randomization</b>                                  |                                               |                                                |                                                |                                  |                                   |
| PPG ≤7.8 mmol/L                                                                     | 27.8                                          | 19.9                                           | 21.6                                           | Mealtime faster aspart vs. IAsp  | 1.54 [1.05; 2.26]                 |
|                                                                                     |                                               |                                                |                                                | Post-meal faster aspart vs. IAsp | 0.98 [0.66; 1.47]                 |
|                                                                                     | <b>Faster aspart<br/>(mealtime),<br/>mean</b> | <b>Faster aspart<br/>(post-meal),<br/>mean</b> | <b>Insulin aspart<br/>(mealtime),<br/>mean</b> | <b>Treatment comparison</b>      | <b>ETD [95% CI]</b>               |
| <b>Change from baseline 26 weeks after randomization</b>                            |                                               |                                                |                                                |                                  |                                   |
| 30-min PPG increment (meal test),<br>mmol/L                                         | -0.57                                         | 0.87                                           | -0.05                                          | Mealtime faster aspart vs. IAsp  | -0.52 [-0.83; -0.20]*             |
|                                                                                     |                                               |                                                |                                                | Post-meal faster aspart vs. IAsp | 0.93 [0.61; 1.24] <sup>†</sup>    |
| 1-h PPG increment (meal test),<br>mmol/L                                            | -1.02                                         | 0.90                                           | -0.12                                          | Mealtime faster aspart vs. IAsp  | -0.90 [-1.36; -0.45] <sup>†</sup> |
|                                                                                     |                                               |                                                |                                                | Post-meal faster aspart vs. IAsp | 1.01 [0.56; 1.47] <sup>†</sup>    |

|                                             |       |        |       |                                  |                                     |
|---------------------------------------------|-------|--------|-------|----------------------------------|-------------------------------------|
| 2-h PPG increment (meal test), mmol/L       | -0.35 | 0.28   | 0.01  | Mealtime faster aspart vs. IAsp  | -0.35 [-0.98; 0.27]                 |
|                                             |       |        |       | Post-meal faster aspart vs. IAsp | 0.28 [-0.34; 0.90]                  |
| 3-h PPG increment (meal test), mmol/L       | -0.07 | 0.43   | 0.10  | Mealtime faster aspart vs. IAsp  | -0.16 [-0.82; 0.49]                 |
|                                             |       |        |       | Post-meal faster aspart vs. IAsp | 0.34 [-0.32; 0.99]                  |
| 4-h PPG increment (meal test), mmol/L       | -0.03 | 0.43   | 0.12  | Mealtime faster aspart vs. IAsp  | -0.14 [-0.74; 0.45]                 |
|                                             |       |        |       | Post-meal faster aspart vs. IAsp | 0.31 [-0.28; 0.90]                  |
| Mean 7-9-7-point SMBG, mmol/L               | -0.30 | -0.23  | -0.31 | Mealtime faster aspart vs. IAsp  | 0.07 [-0.17; 0.30]                  |
|                                             |       |        |       | Post-meal faster aspart vs. IAsp | 0.15 [-0.09; 0.39]                  |
| 1-h PPG (SMBG, all meals), mmol/L           | -0.65 | -0.004 | -0.25 | Mealtime faster aspart vs. IAsp  | -0.25 [-0.54; 0.04]                 |
|                                             |       |        |       | Post-meal faster aspart vs. IAsp | 0.34 [0.06; 0.63] <sup>‡</sup>      |
| 1-h PPG increment (SMBG, all meals), mmol/L | -0.72 | 0.08   | -0.02 | Mealtime faster aspart vs. IAsp  | -0.48 [-0.74; -0.21]                |
|                                             |       |        |       | Post-meal faster aspart vs. IAsp | 0.25 [-0.01; 0.52]                  |
| 1,5-AG, µg/mL                               | 0.23  | -0.14  | 0.21  | Mealtime faster aspart vs. IAsp  | 0.02 [-0.31; 0.34]                  |
|                                             |       |        |       | Post-meal faster aspart vs. IAsp | -0.35 [-0.68; -0.03] <sup>§</sup>   |
| FPG, mmol/L                                 | 0.17  | 0.46   | 0.56  | Mealtime faster aspart vs. IAsp  | -0.39 [-0.78; -0.0008] <sup>¶</sup> |
|                                             |       |        |       | Post-meal faster aspart vs. IAsp | -0.10 [-0.49; 0.29]                 |

\* $P = 0.001$ , <sup>†</sup> $P < 0.001$ , <sup>‡</sup> $P = 0.019$ , <sup>§</sup> $P = 0.035$ , <sup>¶</sup> $P = 0.05$

All available information regardless of treatment discontinuation was used.

1,5-AG, 1,5-anhydroglucitol; faster aspart, fast-acting insulin aspart; FPG, fasting plasma glucose; OR, odds ratio; PPG, postprandial glucose; SMBG, self-measured blood glucose; IAsp, insulin aspart.

**Supplementary Table 7.** Daily bolus, basal and total insulin dose (actual) and basal/bolus ratio at week 0 and after 26 weeks of treatment

| Visit<br>(week)                     | Treatment             | N   | Insulin dose |       |        |      |       |
|-------------------------------------|-----------------------|-----|--------------|-------|--------|------|-------|
|                                     |                       |     | Mean         | SD    | Median | Min  | Max   |
| <b>Bolus dose (all meals), U</b>    |                       |     |              |       |        |      |       |
| Week 0                              | Faster aspart (meal)  | 339 | 25.5         | 15.4  | 22.0   | 5.0  | 150.0 |
|                                     | Faster aspart (post)  | 336 | 25.4         | 14.3  | 21.8   | 3.7  | 113.7 |
|                                     | Insulin aspart (meal) | 335 | 26.6         | 14.8  | 23.7   | 6.0  | 100.3 |
| Week 26*                            | Faster aspart (meal)  | 341 | 31.1         | 19.4  | 27.0   | 6.7  | 167.0 |
|                                     | Faster aspart (post)  | 337 | 30.5         | 18.9  | 26.0   | 5.0  | 142.0 |
|                                     | Insulin aspart (meal) | 340 | 33.5         | 22.5  | 27.0   | 5.7  | 133.0 |
| <b>Basal dose, U</b>                |                       |     |              |       |        |      |       |
| Week 0                              | Faster aspart (meal)  | 342 | 25.3         | 14.5  | 22.0   | 5.0  | 96.0  |
|                                     | Faster aspart (post)  | 339 | 26.7         | 15.6  | 22.7   | 2.0  | 148.0 |
|                                     | Insulin aspart (meal) | 339 | 26.2         | 15.0  | 23.3   | 4.0  | 94.0  |
| Week 26*                            | Faster aspart (meal)  | 342 | 26.7         | 16.6  | 23.0   | 6.0  | 120.0 |
|                                     | Faster aspart (post)  | 339 | 27.3         | 16.8  | 23.0   | 2.0  | 142.0 |
|                                     | Insulin aspart (meal) | 340 | 27.2         | 17.3  | 24.0   | 5.0  | 146.0 |
| <b>Total insulin dose, U</b>        |                       |     |              |       |        |      |       |
| Week 0                              | Faster aspart (meal)  | 339 | 50.8         | 26.1  | 45.3   | 16.3 | 232.0 |
|                                     | Faster aspart (post)  | 335 | 52.2         | 25.2  | 46.0   | 12.0 | 224.0 |
|                                     | Insulin aspart (meal) | 335 | 53.1         | 25.9  | 46.0   | 13.0 | 184.0 |
| Week 26*                            | Faster aspart (meal)  | 341 | 57.7         | 31.4  | 50.0   | 16.0 | 243.0 |
|                                     | Faster aspart (post)  | 336 | 57.8         | 30.2  | 50.7   | 10.7 | 233.0 |
|                                     | Insulin aspart (meal) | 340 | 60.4         | 34.0  | 49.5   | 14.5 | 202.0 |
| <b>Bolus dose (all meals), U/kg</b> |                       |     |              |       |        |      |       |
| Week 0                              | Faster aspart (meal)  | 339 | 0.356        | 0.198 | 0.308  | 0.08 | 1.69  |
|                                     | Faster aspart (post)  | 336 | 0.360        | 0.189 | 0.313  | 0.06 | 1.43  |
|                                     | Insulin aspart (meal) | 335 | 0.379        | 0.214 | 0.326  | 0.07 | 1.46  |
| Week 26*                            | Faster aspart (meal)  | 341 | 0.426        | 0.252 | 0.385  | 0.09 | 1.88  |
|                                     | Faster aspart (post)  | 337 | 0.428        | 0.279 | 0.378  | 0.08 | 2.79  |
|                                     | Insulin aspart (meal) | 340 | 0.469        | 0.331 | 0.359  | 0.06 | 2.26  |
| <b>Basal dose, U/kg</b>             |                       |     |              |       |        |      |       |
| Week 0                              | Faster aspart (meal)  | 342 | 0.341        | 0.148 | 0.316  | 0.07 | 0.96  |

|                                 |                       |     |       |       |       |      |      |
|---------------------------------|-----------------------|-----|-------|-------|-------|------|------|
|                                 | Faster aspart (post)  | 339 | 0.365 | 0.171 | 0.332 | 0.02 | 1.70 |
|                                 | Insulin aspart (meal) | 339 | 0.358 | 0.174 | 0.316 | 0.07 | 1.26 |
| Week 26*                        | Faster aspart (meal)  | 342 | 0.349 | 0.161 | 0.314 | 0.09 | 1.19 |
|                                 | Faster aspart (post)  | 339 | 0.364 | 0.177 | 0.327 | 0.04 | 1.70 |
|                                 | Insulin aspart (meal) | 340 | 0.363 | 0.193 | 0.315 | 0.08 | 1.61 |
| <b>Total insulin dose, U/kg</b> |                       |     |       |       |       |      |      |
| Week 0                          | Faster aspart (meal)  | 339 | 0.697 | 0.287 | 0.633 | 0.26 | 2.62 |
|                                 | Faster aspart (post)  | 335 | 0.725 | 0.287 | 0.674 | 0.14 | 2.59 |
|                                 | Insulin aspart (meal) | 335 | 0.739 | 0.332 | 0.661 | 0.19 | 2.34 |
| Week 26*                        | Faster aspart (meal)  | 341 | 0.773 | 0.345 | 0.705 | 0.21 | 2.66 |
|                                 | Faster aspart (post)  | 336 | 0.793 | 0.375 | 0.712 | 0.20 | 3.40 |
|                                 | Insulin aspart (meal) | 340 | 0.828 | 0.455 | 0.699 | 0.22 | 3.61 |

| <b>Basal/bolus ratio</b> | <b>Faster aspart<br/>(mealtime)</b> | <b>Faster aspart<br/>(post-meal)</b> | <b>Insulin aspart<br/>(mealtime)</b> |
|--------------------------|-------------------------------------|--------------------------------------|--------------------------------------|
| Week 0                   | 49/51                               | 50/50                                | 48/52                                |
| Week 26                  | 45/55                               | 45/55                                | 43/57                                |

Safety analysis set. \*End of trial contains last available measurement. Bolus is the sum of all bolus injections during a day, and an average over 3 days before a visit.

Faster aspart, fast-acting insulin aspart; meal, mealtime; N, number of participants; post, post-meal; SD, standard deviation.

**Supplementary Table 8.** Treatment-emergent adverse events

|                          | Faster aspart (mealtime) |      |     |       | Faster aspart (post-meal) |      |     |       | Insulin aspart (mealtime) |      |     |       |
|--------------------------|--------------------------|------|-----|-------|---------------------------|------|-----|-------|---------------------------|------|-----|-------|
|                          | N                        | %    | E   | R     | N                         | %    | E   | R     | N                         | %    | E   | R     |
| Treatment-emergent AEs   | 240                      | 70.2 | 649 | 3.79  | 237                       | 69.5 | 656 | 3.85  | 248                       | 72.5 | 627 | 3.69  |
| Serious AEs              | 20                       | 5.8  | 27  | 0.16  | 17                        | 5.0  | 23  | 0.14  | 17                        | 5.0  | 19  | 0.11  |
| Injection-site reactions | 8                        | 2.3  | 9   | 0.053 | 8                         | 2.3  | 12  | 0.071 | 5                         | 1.5  | 10  | 0.059 |
| Allergic reactions       | 9                        | 2.6  | 13  | 0.076 | 14                        | 4.1  | 16  | 0.094 | 11                        | 3.2  | 11  | 0.065 |
| Dermatitis               | 1                        | 0.3  | 3   | 0.018 | 4                         | 1.2  | 4   | 0.024 | 0                         | 0    | 0   | –     |

Treatment-emergent: events occur after trial product administration after randomization and no later than 7 days after last trial product administration. Serious AE was defined as any of the following: suspicion of infectious agents; death; life-threatening experience; inpatient hospitalization/prolonging of existing hospitalization; persistent or significant disability or incapacity; congenital anomaly or birth defect; or another event that, based on appropriate medical judgment, may jeopardize the participant and require medical or surgical intervention to prevent one of the outcomes listed in this definition. All injection-site reactions include: injection-site reaction, injection-site bruising, injection-site hypertrophy, injection-site erythema, injection-site hematoma and injection-site irritation.

%, percentage of participants; AE, adverse event; E, events; N, number; R, rate per patient-year of exposure.

## 1 **Supplementary Appendix**

### 2 *Full inclusion criteria*

- 3 1. Informed consent obtained before any trial-related activities. Trial-related activities  
4 are any procedures that are carried out as part of the trial, including activities to  
5 determine suitability for the trial.
- 6 2. Male or female, age  $\geq 18$  years (for Japan and Taiwan: age  $\geq 20$  years) at the time of  
7 signing informed consent.
- 8 3. Type 1 diabetes (based on clinical judgement and/or supported by laboratory analysis  
9 as per local guidelines)  $\geq 12$  months prior to screening.
- 10 4. Currently treated with a basal–bolus insulin regimen for at least 12 months prior to  
11 screening.
- 12 5. Currently treated with a basal insulin analogue for at least 4 months prior to screening
- 13 6. HbA1c 7.0–9.5% (53–80 mmol/mol) (both inclusive) as assessed by central  
14 laboratory
- 15 7. Body mass index  $\leq 35.0$  kg/m<sup>2</sup>.
- 16 8. Ability and willingness to adhere to the protocol including performing of self-  
17 measured plasma glucose profiles and meal test.
- 18 9. Ability and willingness to take at least three mealtime boluses a day every day during  
19 the trial.
- 20 10. Not currently using flash glucose monitoring or real-time continuous glucose  
21 monitoring system and/or willing not to use flash glucose monitoring or a real-time  
22 continuous glucose monitoring system during the trial.

23

### 24 *Full exclusion criteria*

- 25 1. Known or suspected hypersensitivity to trial product(s) or related products.
- 26 2. Previous participation in this trial. Participation is defined as signed informed consent.
- 27 3. Female who is pregnant, breast-feeding or intends to become pregnant or is of child-  
28 bearing potential and not using adequate contraceptive methods (adequate  
29 contraceptive measures as required by local regulation or practice).



30 For Austria, Germany and Italy only: Adequate contraceptive measures are defined as  
31 those which result in a less than 1% failure rate per year when used consistently and  
32 correctly such as implants, injectables, combined oral contraceptives, hormonal  
33 intrauterine devices, sexual abstinence or vasectomized partner.

34 For Japan only: Adequate contraceptive measures are abstinence (not having sex),  
35 diaphragm, condom (by the partner), intrauterine device, sponge, spermicide or oral  
36 contraceptives.

- 37 4. Receipt of any investigational medicinal product within 4 weeks before screening.
- 38 5. Anticipated change in lifestyle (e.g. eating, exercise or sleeping pattern) during the  
39 trial.
- 40 6. Within the past 180 days any of the following: myocardial infarction, stroke or  
41 hospitalization for unstable angina and/or transient ischemic attack.
- 42 7. Participants presently classified as being in New York Heart Association Class IV.
- 43 8. Currently planned coronary, carotid or peripheral artery revascularization.
- 44 9. Inadequately treated blood pressure as defined as Class 2 hypertension or higher  
45 (systolic  $\geq 160$  mmHg or diastolic  $\geq 100$  mmHg).
- 46 10. Impaired liver function, defined as alanine aminotransferase  $\geq 2.5$  times upper limit of  
47 normal.
- 48 11. Renal impairment estimated glomerular filtration rate  $\leq 60$  mL/min/1.73 m<sup>2</sup> as  
49 assessed by central laboratory.
- 50 12. Anticipated initiation or change in concomitant medications in excess of two weeks  
51 known to affect weight or glucose metabolism, such as weight loss/modifying (e.g.  
52 sibutramine, orlistat, thyroid hormones, corticosteroids).
- 53 13. Proliferative retinopathy or maculopathy requiring acute treatment as verified by  
54 fundus photography or dilated fundoscopy performed within three months before  
55 screening.
- 56 14. Diabetic ketoacidosis requiring hospitalization within the last 180 days prior to  
57 screening.

- 58 15. Treatment with any medication for the indication of diabetes or obesity other than  
59 stated in the inclusion criteria in a period of 3 months before screening.
- 60 16. Diagnosis of malignant neoplasms within the last 5 years (except basal and squamous  
61 cell skin cancer, polyps and in-situ carcinomas) prior to screening.
- 62 17. Any condition which, in the opinion of the Investigator might jeopardize participant's  
63 safety or compliance with the protocol.
- 64 18. Anticipated initiation in use of real-time continuous glucose monitoring system during  
65 the trial.
- 66 19. For Austria, Germany and Italy only: Known hypoglycaemic unawareness as judged  
67 by the Investigator.
- 68 20. For Austria, Germany and Italy only: Participants with gastroparesis as judged by the  
69 Investigator.

70

71 *Supportive secondary safety endpoint definitions*

72 Treatment-emergent adverse events (TEAEs) are defined as adverse events that had an onset  
73 date on or after first day of exposure to treatment, and no later than 7 days after last day of  
74 treatment).

75 Hypoglycaemia was defined as treatment-emergent if the onset of the episode occurred on or  
76 after first day of treatment administration after randomization and no later than 1 day after the  
77 last day on treatment.

78 Severe hypoglycaemia was defined according to the American Diabetes Association (ADA)  
79 classification. Severe or BG-confirmed hypoglycaemia was defined as an episode that is  
80 severe according to the ADA classification\* or BG-confirmed by a PG <3.1 mmol/L with or  
81 without symptoms consistent with hypoglycaemia.

82 \*American Diabetes Association. 6. Glycemic Targets: Standards of Medical Care in  
83 Diabetes-2018. *Diabetes Care* 2018; **41**(Suppl 1): S55–S64.

84

85 *Statistical methods*

86

87 Sample size calculations

88 The sample size was determined to ensure a sufficient power for the first step and the second  
89 step in the hierarchical testing procedure. The following assumptions were used for the  
90 sample size calculations:

91

---

|        | <b>Significance</b> | <b>Non-inferiority</b> | <b>SD</b> | <b>Mean difference</b> |
|--------|---------------------|------------------------|-----------|------------------------|
|        | <b>level</b>        | <b>margin</b>          |           |                        |
| Step 1 | One-sided 2.5%      | 0.4% (absolute)        | 1.2       | 0.0                    |
| Step 2 | One-sided 2.5%      | 0.4% (absolute)        | 1.2       | 0.1                    |

---

92 SD, standard deviation.

93

94 As trials in this population, where participants discontinuing treatment are followed up, is  
95 limited, a conservative estimate of the standard deviation (SD) in change from baseline in  
96 HbA1c of 1.2% was chosen. Based on t-statistics under the above assumptions, a total of  
97 333 participants per arm gives 99.0% power to conclude HbA1c non-inferiority for the first  
98 step. This sample size gives 89.6% marginal power to conclude HbA1c non-inferiority for the  
99 second step.

100

101 Confirmatory analyses

102 The primary analysis was based on all participants included in the FAS using the in-trial  
103 observation period and implemented as a statistical model using multiple imputation where  
104 the participants without HbA1c measurements at scheduled visits would have their change  
105 from baseline HbA1c value(s) imputed from the available information from the treatment to  
106 which the participant had been randomized. The analysis was implemented as follows:

- 107 • In the first step, intermittent missing values were imputed using a Markov Chain  
108 Monte Carlo (MCMC) method, in order to obtain a monotone missing data pattern.

109 This imputation was done for each group separately and 100 copies of the dataset  
110 were generated.

- 111 • In the second step, for each of the 100 copies of the dataset, an analysis of variance  
112 model with region and bolus adjusting method at randomization (principles of flexible  
113 dosing based on the carbohydrate content of the meal or using bolus dosing  
114 algorithms) as factors, and baseline HbA1c as a covariate was fitted to the change in  
115 HbA1c from baseline to week 4 for each treatment group separately. The estimated  
116 parameters, and their variances, from these models were used to impute missing  
117 values at week 4 for participants in each treatment group, based on region, bolus  
118 adjusting method and baseline HbA1c.
- 119 • In the third step, for each of the 100 copies of the dataset, missing values at week 8  
120 were imputed in the same way as for week 4. The imputations were based on an  
121 analysis of variance model with region and bolus adjusting method as factors and  
122 baseline HbA1c and change from baseline in HbA1c at week 4 as covariates.
- 123 • This stepwise procedure was then to be repeated sequentially for week 12, 16, 20, 24  
124 and 26.
- 125 • For each of the complete data sets, the change from baseline to week 26 was analysed  
126 using an analysis of variance model with treatment, region, and bolus adjusting  
127 method as factors, and baseline HbA1c as a covariate.

128

129 The estimates and SDs for the 100 data sets were pooled using Rubin's formula:

$$m_{MI} = \frac{1}{100} \sum_{i=1}^{100} m_i, \quad SD_{MI} = \sqrt{\frac{1}{100} \sum_{i=1}^{100} SD_i^2 + \left(1 + \frac{1}{100}\right) \left(\frac{1}{100 - 1}\right) \sum_{i=1}^{100} (m_i - m_{MI})^2},$$

130

131 where  $m_i$  and  $SD_i$  were the estimated means and SDs for the 100 copies of the dataset, and  
132  $m_{MI}$  and  $SD_{MI}$  were the pooled estimates.

133

134 – From  $m_{MI}$  and  $SD_{MI}$ , the 95% CI for the treatment differences was calculated.

135

136 Non-inferiority of mealtime faster aspart was considered confirmed if the upper boundary of  
137 the two-sided 95% CI was below or equal to 0.4% or equivalent if the *P*-value for the one-  
138 sided test of

139  $H_0: D > 0.4\%$  against  $H_A: D \leq 0.4\%$

140 was less than or equal to 2.5%, where *D* was the mean treatment difference (mealtime faster  
141 aspart minus mealtime IAsp).

142

143 Provided that the hierarchical testing allowed, the evaluation of HbA1c non-inferiority of  
144 post-meal faster aspart and HbA1c superiority of mealtime faster aspart (steps 2 and 4 in the  
145 hierarchical testing procedure) was to be based on the same statistical model as the primary  
146 analysis.

147

148 Rationale for using a non-inferiority margin of 0.4%: placebo-controlled trials conducted  
149 in people with type 1 diabetes are considered unethical. In people with type 2 diabetes, the  
150 addition of bolus insulin to a basal-only insulin regimen resulted in an HbA1c improvement  
151 of ~1.0%.<sup>17</sup> Assuming a similar effect in people with type 1 diabetes, ~0.6% of the effect  
152 would be preserved when using a non-inferiority margin of 0.4%.

153

154 The trial also addressed the treatment effect if all subjects had taken the treatment as directed  
155 and continued on-treatment until 26 weeks (data not shown). The results were similar to the  
156 results from the primary analysis due to the high completion rate of the treatment period;  
157 therefore, this manuscript does not present the results for this different target of estimation.

158

159 Confirmatory secondary endpoints

160 **Change from baseline in 1-h PPG increments 26 weeks after randomization (meal test)**

161 Step 3 in the hierarchical testing procedure is to confirm superiority of changes from baseline  
162 in 1-h PPG increments (meal test) 26 weeks after randomization with mealtime faster aspart  
163 compared with mealtime IAsp using FAS. The 1-h PPG increment was derived using the 1-h  
164 PPG measurement minus the pre-prandial PG. Change from baseline in 1-h PPG increment  
165 26 weeks after randomization was analysed using an analysis of variance model (ANOVA)

166 including treatment, region, and bolus adjusting method as factors and 1-h PPG increment at  
167 baseline as covariate.

168

169 **Change from baseline in 1,5-anhydroglucitol 26 weeks after randomization**

170 Step 5 in the hierarchical testing procedure is to confirm superiority of changes from baseline  
171 in 1,5-anhydroglucitol 26 weeks after randomization with mealtime faster aspart compared  
172 with mealtime IAsp using FAS. Change from baseline in 1,5-anhydroglucitol 26 weeks after  
173 randomization was analysed using a model similar to the primary analysis except with the  
174 corresponding baseline value as a covariate.

175

176 Supportive secondary efficacy endpoints

177 All efficacy endpoints except insulin dose were assessed using the FAS and the in-trial  
178 observation period. In-trial observation period was determined as the observation period from  
179 date of randomization and until last trial-related participant site contact. The in-trial  
180 observation period included data collected after treatment discontinuation. Insulin dose was  
181 presented based on the safety analysis set.

182

183 Change from baseline in PPG and PPG increment endpoints (meal test) 26 weeks after  
184 randomization were analysed separately using an ANOVA including treatment, region, and  
185 bolus adjusting method as factors and the corresponding baseline value as covariate.

186

187 Participants who achieved the HbA1c and PPG responder endpoints were analysed separately  
188 based on a logistic regression model using treatment, region, and bolus adjusting method as  
189 factors, and corresponding baseline value as covariate. In the analysis of each endpoint,  
190 participants without a measurement at week 26 were treated as non-responders.

191

192 The mean of the 7-9-7-point SMBG profile was defined as the area under the profile divided  
193 by the measurement time, and was calculated using the trapezoidal method. Change from  
194 baseline in the mean of the 7-9-7-point profile 26 weeks after randomization was analysed

195 using a model similar to primary analysis except with the corresponding baseline value as  
196 covariate.

197

198 Change from baseline in mean PPG and PPG increment overall three meals 26 weeks after  
199 randomization was analysed separately using a model similar to primary analysis, except with  
200 the corresponding baseline value as covariate.

201

202 Change from baseline in PPG and PPG increment endpoints 26 weeks after randomization for  
203 the individual meals (breakfast, lunch, main evening meal) was analysed separately using a  
204 model similar to the primary analysis except with the corresponding baseline value as  
205 covariate.

206

207 Change from baseline in FPG and 1,5-anhydroglucitol 26 weeks after randomization were  
208 analysed separately using a model similar to primary analysis except with the corresponding  
209 baseline value as covariate.

210

#### 211 Supportive secondary safety endpoints

212 Treatment emergent adverse endpoints, physical examination, vital signs, fundoscopy,  
213 electrocardiograms and other laboratory assessments were subject to descriptive statistics  
214 using the safety analysis set. Data were collected from the date of first dose of randomized  
215 treatment up to and including 7 days after treatment discontinuation.

216

217 Treatment-emergent severe or BG-confirmed hypoglycaemic episodes were categorized in  
218 relation to time since start of meal.

- 219 • During first 1, 2, and 4 h after start of meal
- 220 • Between 1 (exclusive) to 2 h (inclusive) after start of meal
- 221 • Between 2 (exclusive) to 3 h (inclusive) after start of meal
- 222 • Between 3 (exclusive) to 4 h (inclusive) after start of meal
- 223 • Between 2 (exclusive) to 4 h (inclusive) after start of meal

224

225 The number of treatment-emergent severe or BG-confirmed hypoglycaemic episodes (all,  
226 daytime, nocturnal, 1 h, 2 h, 4 h, 1 [exclusive] to 2 h [inclusive], 2 [exclusive] to 3 h  
227 [inclusive], 3 [exclusive] to 4 h [inclusive], and from 2 h [exclusive] to 4 h [inclusive] after  
228 start of meal) were analysed using a negative binomial regression model with a log-link  
229 function and the logarithm of the time period for which a hypoglycaemic episode was  
230 considered treatment-emergent as offset. The model includes treatment, region, and bolus  
231 adjusting method as factors.

232

233 Change from baseline in body weight 26 weeks after randomization was analysed using a  
234 model similar to the primary analysis, except with the corresponding baseline value as  
235 covariate. The analysis was to be based on the safety analysis set and data collected from date  
236 of first dose of randomized treatment up to and including 7 days after treatment  
237 discontinuation.

238

239 *Results*

240 Safety endpoints

241 **Rate of treatment-emergent severe or BG-confirmed hypoglycaemic episodes**

242 There were no significant differences between the faster aspart (mealtime or post-meal) and  
243 IAsp arms. The estimated rate ratio [95% CI] was 0.84 (0.70;1.01) for mealtime faster aspart  
244 versus IAsp, and 0.97 (0.81;1.16) for post-meal faster aspart versus mealtime IAsp.

245 **Change from baseline in body weight**

246 There were no statistically significant differences between mealtime faster aspart and IAsp  
247 (ETD [95% CI] 0.19 kg [-0.22;0.60]) or post-meal faster aspart and mealtime IAsp (-0.08 kg  
248 [-0.49;0.33]).

249 **Injection site and allergic reactions**

250 In total, 31 were reported in 21 participants, and 40 allergic reactions were reported in 34  
251 participants (Table 2).

252 **Vital signs, physical examination, safety laboratory assessments**



253 No significant clinical differences in biochemistry, haematology, lipids and urinalysis,  
254 fundoscopy, anti-IAsp antibody development (specific and cross-reacting with human  
255 insulin) and electrocardiogram, across the three treatment arms.  
256

257 *List of participating investigators*

258 **Austria:** Rudolf Prager, Bernhard Ludvik, Thomas Pieber, Bernhard Paulweber; **Bulgaria:**  
259 Ivona Daskalova, Antoanela Slavcheva Petrova-Gancheva, Nikolay Botushanov, Katya  
260 Todorova, Zdravko Kamenov, Zhulieta Prakova-Teneva, Kiril Hristozov, Maria Orbetsova;  
261 **Canada:** Remi Rabasa-Lhoret, Thomas Peter Patrick Ransom, Buki Ajala, Martin  
262 D'Amours, Ronald M Goldenberg, Isabelle Labonté; **Germany:** Thomas Behnke, Ralf  
263 Jordan, Jörg Lüdemann, Andrea Mölle, Joachim Müller, Ludger Rose, Andreas  
264 Staudenmeyer, Uta Dorothea Stephan; **Israel:** Ofri Mosenzon, Moshe Phillip, Naim  
265 Shehadeh, Josef Cohen, Julio Wainstein, Anat Tsur; **India:** P Rao, Riddhi das Gupta, RM  
266 Anjana, Chandni R, Abhay A Mutha, Nikhil Tandon, Alok Kanungo, CS Yajnik, Tiven  
267 Marwah, Sanjeev Ratnakar Phatak, Sandeep Julka, Jaiganesh Muruganandam, Rajesh Rajput,  
268 Anil Bhansali, Vivekanand Bongi, Sunil M Jain; **Italy:** PierMaco Piatti, Roberto Trevisan,  
269 Dario Pitocco, Massimo Boemi, Agostino Gnasso, Stefano Genovese; **Japan:** Yuri Ono,  
270 Hidenori Bando, Takashi Sasaki, Hiroaki Seino, Takeshi Osonoi, Yukiko Onishi, Shinichiro  
271 Shirabe, Kiyokazu Matoba, Shizuka Kaneko, Ryoya Komatsu, Tomoyuki Kawamura,  
272 Toshikazu Takahashi, Hideaki Jinnouchi, Nobuyuki Abe, Shuji Nakamura, Rimei Nishimura,  
273 Mitsuhiisa Komatsu, Yasuko Uchigata, Junnosuke Miura, Fuji Ikeda, Hiroki Ikeda, Katsuya  
274 Yamazaki, Hideo Takahashi, Eiji Kawasaki, Nobuyuki Sato; **Serbia:** Nebojsa Lalic, Katarina  
275 Lalic, Aleksandra Kendereski; **Russia:** Diana N Alpenidze, Alexandr S Ametov, Lidia V  
276 Belousova, Vadim V Klimontov, Maria A Kunitsyna, Olga E Lantseva, Tatiana A Lysenko,  
277 Nina A Petunina, Olga Sazonova, Lyudmila A Suplotova, Gulnar R Vagapova, Alexey V  
278 Zilov; **Taiwan:** Shih-Tzer Tsai, Sung-Chen Liu, Chia-Hung Lin; **USA:** John Chip Hamilton  
279 Reed, Mark P Christiansen, Carl Vance, Harold E Bays, James W Chu, Ronald Graf, David  
280 Huffman, Daniel A Nadeau, Steven Nagelberg, Leonard Ross Zemel, Elizabeth Barranco-  
281 Santana, Sumana Gangi, Phillip A Levin, John Charles Parker, Hemant Tuljaram Thawani,  
282 Kenneth Cohen, Tira Chaicha-Brom, Jackson M Rhudy, Syed WH Rizvi, John J Shelmet,  
283 Craig S Stump, Mark L Warren, Sady Alpizar, Carlos Jesus Arauz-Pacheco, Stephen L  
284 Aronoff, Anders Carlson, William C Biggs, Peter Bressler, Elizabeth Hackman Harris,  
285 Christopher Case, Harold Cathcart, Seth Charatz, John Gilbert, Priscilla Hollander, David M  
286 Kayne, Patrick McCarthy, Helena W Rodbard, Paul Rosenblit, Stephanie Shaw, Larry  
287 Stonesifer, Leslie J Klaff, Michael Valitutto, Jesus L Penabad, Alan Wynne, Michael Adams,  
288 Robert Hood, James Wood, Jack Wahlen, Gregg Gerety, Lyle Myers, Paul C Norwood, Julio

- 289 Rosenstock, Kristin Castorino, Anna Chang, Robert Ferraro, Samer N Nakhle, Robert J  
290 Silver, Timothy S Bailey, Valerie Espinosa.
